# Supplementary material for: Clinicopathological and Prognostic Significance of ABCC3 in Human Glioma
Source: Hindawi journal article supplement (doi:10.1155/2021/1827992), 2021-12-23
Supplement: f1 [file 1827992.f1.pdf]

Supplementary Table S1 ROC-related gene filtration in glioma patients.

| gene         | roc      | gene          | roc      |
|--------------|----------|---------------|----------|
| ABCC3        | 0.717183 | KPNA2         | 0.721989 |
| ABRACL       | 0.707059 | LAMC1         | 0.726594 |
| AK2          | 0.720493 | LEPRE1        | 0.716432 |
| ANXA1        | 0.740433 | LOXL1         | 0.7467   |
| ARAP3        | 0.721128 | MAGOH         | 0.728124 |
| ARPC5        | 0.700578 | MED8          | 0.715196 |
| AURKA        | 0.711717 | MELK          | 0.700021 |
| BCAT1        | 0.73663  | METTL7B       | 0.757509 |
| CCDC109B     | 0.729459 | MMP14         | 0.705737 |
| CCDC18       | 0.70791  | MRC2          | 0.722152 |
| CCNB1        | 0.706207 | MSN           | 0.728545 |
| CD276        | 0.720634 | NFE2L3        | 0.712142 |
| CD58         | 0.724821 | NRBP1         | 0.702211 |
| CDC20        | 0.717674 | PBX3          | 0.70294  |
| CDC6         | 0.714595 | PDCL3         | 0.713291 |
| CDCA2        | 0.70145  | PDIA4         | 0.702812 |
| CDCA8        | 0.711323 | PDPN          | 0.723369 |
| CDKN2C       | 0.705471 | PHTF1         | 0.701781 |
| CENPA        | 0.701485 | PLAT          | 0.766026 |
| CENPN        | 0.704272 | PLOD1         | 0.720828 |
| CEP112       | 0.717115 | PPIC          | 0.71471  |
| CEP55        | 0.724511 | PSRC1         | 0.723568 |
| CFI          | 0.713751 | PTTG1         | 0.706425 |
| CHI3L1       | 0.758577 | PVT1          | 0.742557 |
| CHI3L2       | 0.703903 | PYGL          | 0.723364 |
| CHRNA9       | 0.721063 | RAB42         | 0.726919 |
| CNIH4        | 0.71857  | RGS16         | 0.725338 |
| COL4A1       | 0.725487 | RP1-40E16.9   | 0.705718 |
| COL4A2       | 0.727699 | RP11-189B4.6  | 0.743238 |
| CRNDE        | 0.716839 | RP11-303E16.2 | 0.709741 |
| CTD-3049M7.1 | 0.714534 | RP11-558F24.4 | 0.700072 |
| DCTD         | 0.709402 | S100A11       | 0.721863 |
| DDOST        | 0.73091  | SERPINA3      | 0.728847 |
| DEPDC1       | 0.711489 | SERPINH1      | 0.733799 |
| DLGAP5       | 0.700099 | SHCBP1        | 0.716768 |
| DRAXIN       | 0.703284 | SLC39A1       | 0.704004 |
| DUSP10       | 0.70439  | SMC4          | 0.712014 |
| ECE1         | 0.719591 | STK40         | 0.742452 |

|           |          |           |          |
|-----------|----------|-----------|----------|
| EFNB1     | 0.718868 | TACC3     | 0.70816  |
| EN1       | 0.726539 | TAF12     | 0.724629 |
| F3        | 0.708664 | TAGLN2    | 0.758519 |
| FAM114A1  | 0.707297 | TBC1D1    | 0.710755 |
| FBLIM1    | 0.705525 | TEAD3     | 0.712065 |
| GAS2L3    | 0.717527 | TGFB2     | 0.708124 |
| GJC1      | 0.719626 | TGIF1     | 0.706378 |
| GNG12     | 0.701069 | TK1       | 0.70779  |
| GNG5      | 0.714215 | TMEM2     | 0.712578 |
| GPX7      | 0.716938 | TMEM71    | 0.702827 |
| H19       | 0.712988 | TMSB4X    | 0.716916 |
| HIST1H1C  | 0.700146 | TNFRSF12A | 0.750488 |
| HIST1H2BJ | 0.723142 | TUBA1C    | 0.719148 |
| HIST1H2BK | 0.729007 | TUBB6     | 0.7332   |
| HIST2H2BE | 0.705646 | TXLNA     | 0.710084 |
| HOTAIRM1  | 0.715286 | TXNDC12   | 0.704541 |
| HOXA-AS2  | 0.706239 | VIM       | 0.737138 |
| HOXA-AS3  | 0.702425 | VMP1      | 0.71708  |
| HOXA1     | 0.702888 | WDR1      | 0.702873 |
| HOXA10    | 0.711912 | WDR77     | 0.710255 |
| HOXA2     | 0.71059  | IGF2BP3   | 0.730934 |
| HOXA3     | 0.719283 | IGFBP2    | 0.764555 |
| HOXA4     | 0.741406 | IKBIP     | 0.710486 |
| HOXA5     | 0.738027 | IQGAP1    | 0.738276 |
| HOXD11    | 0.700887 | KIF20A    | 0.70667  |
| IGF2BP2   | 0.729682 | KIF23     | 0.708592 |
| KIF4A     | 0.709986 | KIF2C     | 0.705973 |
| KLHDC8A   | 0.711924 |           |          |

---
